# Supplementary material
Source: ML conference proceedings conference paper supplement (https://proceedings.mlr.press/v161/joukovsky21a.html)
Supplement: Supplementary file [file joukovsky21a-supp.pdf]

# Generalization Error Bounds for Deep Unfolding RNNs (Supplementary Material)

Boris Joukovsky <sup>1,2</sup>

Tanmoy Mukherjee <sup>1,2</sup>

Huynh Van Luong <sup>1,2</sup>

Nikos Deligiannis <sup>1,2</sup>

<sup>1</sup>Department of Electronics and Informatics, Vrije Universiteit Brussel, Pleinlaan 2, B-1050 Brussels, Belgium

<sup>2</sup>imec, Kapeldreef 75, B-3001 Leuven, Belgium

## 1 PROXIMAL OPERATOR OF REWEIGHTED-RNN

The proximal operator  $\phi_{\frac{\lambda_1}{c}, \frac{\lambda_2}{c}, \hbar}(u)$  is defined as

$$\phi_{\frac{\lambda_1}{c}, \frac{\lambda_2}{c}, \hbar}(u) = \arg \min_{v \in \mathbb{R}^n} \left\{ \frac{1}{c}g(v) + \frac{1}{2}\|v - u\|_2^2 \right\}, \quad (1)$$

where  $g(v) = \lambda_1|v| + \lambda_2|v - \hbar|$ .

Following the proof in Appendix of [Luong et al., 2021],  $\Phi_{\frac{\lambda_1}{c} \mathbf{g}_l, \frac{\lambda_2}{c} \mathbf{g}_l, \hbar}(u)$  is given by

$$\Phi_{\frac{\lambda_1}{c} \mathbf{g}_l, \frac{\lambda_2}{c} \mathbf{g}_l, \hbar}(u) = \begin{cases} u - \frac{\lambda_1}{c} \mathbf{g}_l - \frac{\lambda_2}{c} \mathbf{g}_l, & \hbar + \frac{\lambda_1}{c} \mathbf{g}_l + \frac{\lambda_2}{c} \mathbf{g}_l < u < \infty \\ \hbar, & \hbar + \frac{\lambda_1}{c} \mathbf{g}_l - \frac{\lambda_2}{c} \mathbf{g}_l \leq u \leq \hbar + \frac{\lambda_1}{c} \mathbf{g}_l + \frac{\lambda_2}{c} \mathbf{g}_l \\ u - \frac{\lambda_1}{c} \mathbf{g}_l + \frac{\lambda_2}{c} \mathbf{g}_l, & \frac{\lambda_1}{c} \mathbf{g}_l - \frac{\lambda_2}{c} \mathbf{g}_l < u < \hbar + \frac{\lambda_1}{c} \mathbf{g}_l - \frac{\lambda_2}{c} \mathbf{g}_l \\ 0, & -\frac{\lambda_1}{c} \mathbf{g}_l - \frac{\lambda_2}{c} \mathbf{g}_l \leq u \leq \frac{\lambda_1}{c} \mathbf{g}_l - \frac{\lambda_2}{c} \mathbf{g}_l \\ u + \frac{\lambda_1}{c} \mathbf{g}_l + \frac{\lambda_2}{c} \mathbf{g}_l, & -\infty < u < -\frac{\lambda_1}{c} \mathbf{g}_l - \frac{\lambda_2}{c} \mathbf{g}_l, \end{cases} \quad (2)$$

for  $\hbar \geq 0$  and

$$\Phi_{\frac{\lambda_1}{c} \mathbf{g}_l, \frac{\lambda_2}{c} \mathbf{g}_l, \hbar}(u) = \begin{cases} u - \frac{\lambda_1}{c} \mathbf{g}_l - \frac{\lambda_2}{c} \mathbf{g}_l, & \frac{\lambda_1}{c} \mathbf{g}_l + \frac{\lambda_2}{c} \mathbf{g}_l < u < \infty \\ 0, & -\frac{\lambda_1}{c} \mathbf{g}_l + \frac{\lambda_2}{c} \mathbf{g}_l \leq u \leq \frac{\lambda_1}{c} \mathbf{g}_l + \frac{\lambda_2}{c} \mathbf{g}_l \\ u + \frac{\lambda_1}{c} \mathbf{g}_l - \frac{\lambda_2}{c} \mathbf{g}_l, & \hbar - \frac{\lambda_1}{c} \mathbf{g}_l + \frac{\lambda_2}{c} \mathbf{g}_l < u < -\frac{\lambda_1}{c} \mathbf{g}_l + \frac{\lambda_2}{c} \mathbf{g}_l \\ \hbar, & \hbar - \frac{\lambda_1}{c} \mathbf{g}_l - \frac{\lambda_2}{c} \mathbf{g}_l \leq u \leq \hbar - \frac{\lambda_1}{c} \mathbf{g}_l + \frac{\lambda_2}{c} \mathbf{g}_l \\ u + \frac{\lambda_1}{c} \mathbf{g}_l + \frac{\lambda_2}{c} \mathbf{g}_l, & -\infty < u < \hbar - \frac{\lambda_1}{c} \mathbf{g}_l - \frac{\lambda_2}{c} \mathbf{g}_l \end{cases} \quad (3)$$

for  $\hbar < 0$ .

## 2 SUPPORTS FOR RADEMACHER COMPLEXITY CALCULUS

The contraction lemma in Shalev-Shwartz and Ben-David [2014] shows the Rademacher complexity of the composition of a class of functions with  $\rho$ -Lipschitz functions.

**Proposition 2.1.** [Shalev-Shwartz and Ben-David, 2014, Lemma 26.9—Contraction lemma]

Let  $\mathcal{F}$  be a set of functions,  $\mathcal{F} = \{f : \mathcal{X} \mapsto \mathbb{R}\}$ , and  $\Phi_1, \dots, \Phi_m$ ,  $\rho$ -Lipschitz functions, namely,  $|\Phi_i(\alpha) - \Phi_i(\beta)| \leq \rho|\alpha - \beta|$

for all  $\alpha, \beta \in \mathbb{R}$  for some  $\rho > 0$ . For any sample set  $S$  of  $m$  points  $\mathbf{x}_1, \dots, \mathbf{x}_m \in \mathcal{X}$ , let  $(\Phi \circ f)(\mathbf{x}_i) = \Phi(f(\mathbf{x}_i))$ . Then,

$$\frac{1}{m} \mathbb{E}_{\epsilon \in \{\pm 1\}^m} \left[ \sup_{f \in \mathcal{F}} \sum_{i=1}^m \epsilon_i (\Phi \circ f)(\mathbf{x}_i) \right] \leq \frac{\rho}{m} \mathbb{E}_{\epsilon \in \{\pm 1\}^m} \left[ \sup_{f \in \mathcal{F}} \sum_{i=1}^m \epsilon_i f(\mathbf{x}_i) \right], \quad (4)$$

alternatively,  $\mathfrak{R}_S(\Phi \circ \mathcal{F}) \leq \rho \mathfrak{R}_S(\mathcal{F})$ , where  $\Phi$  denotes  $\Phi_1(\mathbf{x}_1), \dots, \Phi_m(\mathbf{x}_m)$  for  $S$ .

**Proposition 2.2.** [Mohri et al., 2018, Proposition A.1—Hölder’s inequality]

Let  $p, q \geq 1$  be conjugate:  $\frac{1}{p} + \frac{1}{q} = 1$ . Then, for all  $\mathbf{x}, \mathbf{y} \in \mathbb{R}^n$ ,

$$\|\mathbf{x} \cdot \mathbf{y}\|_1 \leq \|\mathbf{x}\|_p \|\mathbf{y}\|_q, \quad (5)$$

with the equality when  $|y_i| = |x_i|^{p-1}$  for all  $i \in [1, n]$ .

### 3 PROOF FOR GENERALIZATION ERROR BOUNDS FOR DEEP UNFOLDING RNNs

*Proof.* We consider the real-valued family of functions  $\mathcal{F}_{d,T} : \mathbb{R}^h \times \mathbb{R}^n \mapsto \mathbb{R}$  for the functions  $f_{\mathcal{W},\mathbf{U}}^{(d)}$  to update  $\mathbf{h}_T^{(d)}$  in layer  $d$ , time step  $T$ , defined as

$$\mathcal{F}_{d,T} = \left\{ (\mathbf{h}_{T-1}^{(d)}, \mathbf{x}_T) \mapsto \Phi(\mathbf{w}_d^T f_{\mathcal{W},\mathbf{U}}^{(d-1)}(\mathbf{h}_{T-1}^{(d)}, \mathbf{x}_T) + \mathbf{u}_d^T \mathbf{x}_T) : \|\mathbf{W}_d\|_{1,\infty} \leq \alpha_d, \|\mathbf{U}_d\|_{1,\infty} \leq \beta_d \right\}, \quad (6)$$

where  $\mathbf{w}_d, \mathbf{u}_d$  are the corresponding rows from  $\mathbf{W}_d, \mathbf{U}_d$ , respectively, and  $\alpha_l, \beta_l$ , with  $1 < l \leq d$ , are nonnegative hyper-parameters. For the first layer and the first time step, i.e.,  $l = 1, t = 1$ , the real-valued family of functions,  $\mathcal{F}_{1,1} : \mathbb{R}^h \times \mathbb{R}^n \mapsto \mathbb{R}$ , for the functions  $f_{\mathcal{W},\mathbf{U}}^{(1)}$  is defined by:

$$\mathcal{F}_{1,1} = \left\{ (\mathbf{h}_0, \mathbf{x}_1) \mapsto \Phi(\mathbf{w}_1^T \mathbf{h}_0 + \mathbf{u}_1^T \mathbf{x}_1) : \|\mathbf{W}_1\|_{1,\infty} \leq \alpha_1, \|\mathbf{U}_1\|_{1,\infty} \leq \beta_1 \right\}, \quad (7)$$

where  $\alpha_1, \beta_1$  are nonnegative hyper-parameters. We denote the input layer as  $f_{\mathcal{W},\mathbf{U}}^{(0)} = \mathbf{h}_0$  at the first time step. From the definition of Rademacher complexity [Definition 3.1] and the family of functions in (6) and (7), we obtain:

$$\begin{aligned} m \mathfrak{R}_S(\mathcal{F}_{d,T}) &\leq \mathbb{E}_{\epsilon \in \{\pm 1\}^m} \left[ \sup_{\substack{\mathcal{W}, \mathbf{U} \\ \|\mathbf{w}_d\|_1 \leq \alpha_d \\ \|\mathbf{u}_d\|_1 \leq \beta_d}} \sum_{i=1}^m \epsilon_i \Phi(\mathbf{w}_d^T f_{\mathcal{W},\mathbf{U}}^{(d-1)}(\mathbf{h}_{T-1,i}, \mathbf{x}_{T,i}) + \mathbf{u}_d^T \mathbf{x}_{T,i}) \right] \\ &\leq \frac{1}{\lambda} \log \exp \left( \mathbb{E}_{\epsilon \in \{\pm 1\}^m} \left[ \sup_{\substack{\mathcal{W}, \mathbf{U} \\ \|\mathbf{w}_d\|_1 \leq \alpha_d \\ \|\mathbf{u}_d\|_1 \leq \beta_d}} \lambda \sum_{i=1}^m \epsilon_i (\mathbf{w}_d^T f_{\mathcal{W},\mathbf{U}}^{(d-1)}(\mathbf{h}_{T-1,i}, \mathbf{x}_{T,i}) + \mathbf{u}_d^T \mathbf{x}_{T,i}) \right] \right) \\ &\leq \frac{1}{\lambda} \log \mathbb{E}_{\epsilon \in \{\pm 1\}^m} \left[ \sup_{\substack{\mathcal{W}, \mathbf{U} \\ \|\mathbf{w}_d\|_1 \leq \alpha_d \\ \|\mathbf{u}_d\|_1 \leq \beta_d}} \exp \left( \lambda \sum_{i=1}^m \epsilon_i (\mathbf{w}_d^T f_{\mathcal{W},\mathbf{U}}^{(d-1)}(\mathbf{h}_{T-1,i}, \mathbf{x}_{T,i})) + \lambda \sum_{i=1}^m \epsilon_i \mathbf{u}_d^T \mathbf{x}_{T,i} \right) \right] \quad (8a) \\ &\leq \frac{1}{\lambda} \log \mathbb{E}_{\epsilon \in \{\pm 1\}^m} \left[ \sup_{\|\mathbf{w}_d\|_1 \leq \alpha_d} \exp \left( \lambda \sum_{i=1}^m \epsilon_i (\mathbf{w}_d^T f_{\mathcal{W},\mathbf{U}}^{(d-1)}(\mathbf{h}_{T-1,i}, \mathbf{x}_{T,i})) \right) \sup_{\|\mathbf{u}_d\|_1 \leq \beta_d} \exp \left( \lambda \sum_{i=1}^m \epsilon_i \mathbf{u}_d^T \mathbf{x}_{T,i} \right) \right], \quad (8b) \end{aligned}$$

where  $\lambda > 0$  is an arbitrary parameter, Eq. (8a) follows Lemma 2.1 for 1-Lipschitz  $\Phi$  a long with Inequality (20), and (8b) holds by Inequality (17).

For layer  $1 \leq l \leq d$  and time step  $t$ , let us denote:

$$\Delta_{\mathbf{h}_{t-1}, \mathbf{x}_t}^{(l)} = \sup_{\substack{\mathbf{w}, \mathbf{u} \\ \|\mathbf{w}_l\|_1 \leq \alpha_l}} \exp \left( \lambda \Lambda_l \sum_{i=1}^m \epsilon_i \left( \mathbf{w}_l^\top f_{\mathbf{w}, \mathbf{u}}^{(l-1)}(\mathbf{h}_{t-1, i}, \mathbf{x}_{t, i}) \right) \right), \quad (9)$$

$$\Delta_{\mathbf{x}_t}^{(l)} = \sup_{\|\mathbf{u}_l\|_1 \leq \beta_l} \exp \left( \lambda \Lambda_l \sum_{i=1}^m \epsilon_i \left( \mathbf{u}_l^\top \mathbf{x}_{t, i} \right) \right), \quad (10)$$

where  $\Lambda_l$  is defined as follows:  $\Lambda_d = 1$ ,  $\Lambda_l = \prod_{k=l+1}^d \alpha_k$  with  $1 \leq l \leq d-1$ , and  $\Lambda_0 = \prod_{k=1}^d \alpha_k$ .

Following the Hölder's inequality in (5) in case of  $p = 1$  and  $q = \infty$  applied to  $\mathbf{w}_l^\top$  and  $f_{\mathbf{w}, \mathbf{u}}^{(l-1)}(\mathbf{h}_{t-1, i}, \mathbf{x}_{t, i})$  in (9), respectively, we get:

$$\begin{aligned} \Delta_{\mathbf{h}_{t-1}, \mathbf{x}_t}^{(d)} &\leq \sup_{\substack{\mathbf{w}, \mathbf{u} \\ \|\mathbf{w}_{d-1}\|_{1, \infty} \leq \alpha_{d-1} \\ \|\mathbf{u}_{d-1}\|_{1, \infty} \leq \beta_{d-1}}} \exp \left( \lambda \alpha_d \left\| \sum_{i=1}^m \epsilon_i \Phi \left( \mathbf{w}_{d-1} f_{\mathbf{w}, \mathbf{u}}^{(d-2)}(\mathbf{h}_{t-1, i}, \mathbf{x}_{t, i}) + \mathbf{u}_{d-1} \mathbf{x}_{t, i} \right) \right\|_{\infty} \right) \\ &\leq \sup_{\substack{\mathbf{w}, \mathbf{u} \\ \|\mathbf{w}_{d-1, k}\|_1 \leq \alpha_{d-1} \\ \|\mathbf{u}_{d-1, k}\|_1 \leq \beta_{d-1}}} \exp \left( \lambda \alpha_d \max_{k \in \{1, \dots, h\}} \left| \sum_{i=1}^m \epsilon_i \Phi \left( \mathbf{w}_{d-1, k}^\top f_{\mathbf{w}, \mathbf{u}}^{(d-2)}(\mathbf{h}_{t-1, i}, \mathbf{x}_{t, i}) + \mathbf{u}_{d-1, k}^\top \mathbf{x}_{t, i} \right) \right| \right) \\ &\leq \sup_{\substack{\mathbf{w}, \mathbf{u} \\ \|\mathbf{w}_{d-1, k}\|_1 \leq \alpha_{d-1} \\ \|\mathbf{u}_{d-1, k}\|_1 \leq \beta_{d-1}}} \exp \left( \lambda \alpha_d \left| \sum_{i=1}^m \epsilon_i \Phi \left( \mathbf{w}_{d-1, k}^\top f_{\mathbf{w}, \mathbf{u}}^{(d-2)}(\mathbf{h}_{t-1, i}, \mathbf{x}_{t, i}) + \mathbf{u}_{d-1, k}^\top \mathbf{x}_{t, i} \right) \right| \right). \end{aligned} \quad (11)$$

Similarly, from (10), we obtain:

$$\Delta_{\mathbf{x}_t}^{(d)} \leq \sup_{\|\mathbf{u}_d\|_1 \leq \beta_d} \exp \left( \lambda \sum_{i=1}^m \epsilon_i \mathbf{u}_d^\top \mathbf{x}_{t, i} \right) \leq \exp \left( \lambda \beta_d \left\| \sum_{i=1}^m \epsilon_i \mathbf{x}_{t, i} \right\|_{\infty} \right) \leq \exp \left( \lambda \beta_d \left| \sum_{i=1}^m \epsilon_i \mathbf{x}_{\tau, i, \kappa} \right| \right), \quad (12)$$

where  $\{\tau, \kappa\} = \operatorname{argmax}_{t \in \{1, \dots, T\}, j \in \{1, \dots, n\}} \left| \sum_{i=1}^m \epsilon_i \mathbf{x}_{t, i, j} \right|$ .

From (8b), (11), and (12), we get:

$$\begin{aligned} &m \mathfrak{R}_S(\mathcal{F}_{d, T}) \\ &\leq \frac{1}{\lambda} \log \left( \mathbb{E}_{\epsilon \in \{\pm 1\}^m} \left[ \sup_{\substack{\mathbf{w}, \mathbf{u} \\ \|\mathbf{w}_{d-1, k}\|_1 \leq \alpha_{d-1} \\ \|\mathbf{u}_{d-1, k}\|_1 \leq \beta_{d-1}}} \exp \left( \lambda \alpha_d \left| \sum_{i=1}^m \epsilon_i \Phi \left( \mathbf{w}_{d-1, k}^\top f_{\mathbf{w}, \mathbf{u}}^{(d-2)}(\mathbf{h}_{T-1, i}, \mathbf{x}_{T, i}) + \mathbf{u}_{d-1, k}^\top \mathbf{x}_{T, i} \right) \right| + \lambda \beta_d \left| \sum_{i=1}^m \epsilon_i \mathbf{x}_{\tau, i, \kappa} \right| \right) \right] \right) \\ &\leq \frac{1}{\lambda} \log \left( \mathbb{E}_{\epsilon \in \{\pm 1\}^m} \left[ \sup_{\substack{\mathbf{w}, \mathbf{u} \\ \|\mathbf{w}_{d-1, k}\|_1 \leq \alpha_{d-1} \\ \|\mathbf{u}_{d-1, k}\|_1 \leq \beta_{d-1}}} \left( \exp \left( \lambda \alpha_d \sum_{i=1}^m \epsilon_i \Phi \left( \mathbf{w}_{d-1, k}^\top f_{\mathbf{w}, \mathbf{u}}^{(d-2)}(\mathbf{h}_{T-1, i}, \mathbf{x}_{T, i}) + \mathbf{u}_{d-1, k}^\top \mathbf{x}_{T, i} \right) \right) + \lambda \beta_d \sum_{i=1}^m \epsilon_i \mathbf{x}_{\tau, i, \kappa} \right) \right. \right. \\ &\quad + \exp \left( \lambda \alpha_d \sum_{i=1}^m \epsilon_i \Phi \left( \mathbf{w}_{d-1, k}^\top f_{\mathbf{w}, \mathbf{u}}^{(d-2)}(\mathbf{h}_{T-1, i}, \mathbf{x}_{T, i}) + \mathbf{u}_{d-1, k}^\top \mathbf{x}_{T, i} \right) - \lambda \beta_d \sum_{i=1}^m \epsilon_i \mathbf{x}_{\tau, i, \kappa} \right) \\ &\quad + \exp \left( - \lambda \alpha_d \sum_{i=1}^m \epsilon_i \Phi \left( \mathbf{w}_{d-1, k}^\top f_{\mathbf{w}, \mathbf{u}}^{(d-2)}(\mathbf{h}_{T-1, i}, \mathbf{x}_{T, i}) + \mathbf{u}_{d-1, k}^\top \mathbf{x}_{T, i} \right) + \lambda \beta_d \sum_{i=1}^m \epsilon_i \mathbf{x}_{\tau, i, \kappa} \right) \\ &\quad \left. \left. + \exp \left( - \lambda \alpha_d \sum_{i=1}^m \epsilon_i \Phi \left( \mathbf{w}_{d-1, k}^\top f_{\mathbf{w}, \mathbf{u}}^{(d-2)}(\mathbf{h}_{T-1, i}, \mathbf{x}_{T, i}) + \mathbf{u}_{d-1, k}^\top \mathbf{x}_{T, i} \right) - \lambda \beta_d \sum_{i=1}^m \epsilon_i \mathbf{x}_{\tau, i, \kappa} \right) \right) \right] \right) \end{aligned}$$

$$\leq \frac{1}{\lambda} \log \left( 4 \mathbb{E}_{\epsilon \in \{\pm 1\}^m} \left[ \Delta_{\mathbf{h}_{T-1}, \mathbf{x}_T}^{(d-1)} \Delta_{\mathbf{x}_T}^{(d-1)} \exp \left( \beta_d \lambda \sum_{i=1}^m \epsilon_i \mathbf{x}_{T,i,\kappa} \right) \right] \right) \quad (13a)$$

$$\leq \frac{1}{\lambda} \log \left( 4^{d-1} \mathbb{E}_{\epsilon \in \{\pm 1\}^m} \left[ \Delta_{\mathbf{h}_{T-1}, \mathbf{x}_T}^{(1)} \Delta_{\mathbf{x}_T}^{(1)} \exp \left( \lambda \left( \sum_{l=2}^d \beta_l \Lambda_l \right) \sum_{i=1}^m \epsilon_i \mathbf{x}_{T,i,\kappa} \right) \right] \right) \quad (13b)$$

$$\leq \frac{1}{\lambda} \log \left( 4^{d-1} \mathbb{E}_{\epsilon \in \{\pm 1\}^m} \left[ \exp \left( \lambda \left( \sum_{l=2}^d \beta_l \Lambda_l \right) \sum_{i=1}^m \epsilon_i \mathbf{x}_{T,i,\kappa} \right) \sup_{\|\mathbf{w}_1\|_1 \leq \alpha_1} \exp \left( \lambda \Lambda_1 \sum_{i=1}^m \epsilon_i \left( \mathbf{w}_1^T \mathbf{h}_{T-1,i} \right) \right) \right. \right. \\ \left. \left. \cdot \sup_{\|\mathbf{u}_1\|_1 \leq \beta_1} \exp \left( \lambda \Lambda_1 \sum_{i=1}^m \epsilon_i \left( \mathbf{u}_1^T \mathbf{x}_{T,i} \right) \right) \right] \right) \quad (13c)$$

$$\leq \frac{1}{\lambda} \log \left( 4^{d-1} \mathbb{E}_{\epsilon \in \{\pm 1\}^m} \left[ \exp \left( \lambda \left( \sum_{l=2}^d \beta_l \Lambda_l \right) \sum_{i=1}^m \epsilon_i \mathbf{x}_{T,i,\kappa} \right) \sup_{\substack{\|\mathbf{w}_d\|_1 \leq \alpha_d \\ \|\mathbf{u}_d\|_1 \leq \beta_d}} \exp \left( \lambda \Lambda_0 \left\| \sum_{i=1}^m \epsilon_i \mathbf{h}_{T-1,i} \right\|_\infty \right) \right. \right. \\ \left. \left. \cdot \exp \left( \lambda \beta_1 \Lambda_1 \left\| \sum_{i=1}^m \epsilon_i \mathbf{x}_{T,i} \right\|_\infty \right) \right] \right) \quad (13d)$$

$$\leq \frac{1}{\lambda} \log \left( 4^d \mathbb{E}_{\epsilon \in \{\pm 1\}^m} \left[ \exp \left( \lambda \left( \sum_{l=1}^d \beta_l \Lambda_l \right) \sum_{i=1}^m \epsilon_i \mathbf{x}_{T,i,\kappa} \right) \right. \right. \\ \left. \left. \cdot \sup_{\substack{\|\mathbf{w}, \mathbf{u}\|_1 \leq \alpha_d \\ \|\mathbf{u}_d\|_1 \leq \beta_d}} \exp \left( \lambda \Lambda_0 \sum_{i=1}^m \epsilon_i \Phi \left( \mathbf{w}_d^T f_{\mathbf{w}, \mathbf{u}}^{(d-1)} \left( \mathbf{h}_{T-2,i}, \mathbf{x}_{T-1,i} \right) + \mathbf{u}_d^T \mathbf{x}_{T-1,i} \right) \right) \right] \right), \quad (13e)$$

where (13a) holds by Inequality (17) and (13b) follows by repeating the process from layer  $d-1$  to layer 1 for time step  $T$ . Furthermore, (13c) is returned as the beginning of the process for time step  $T-1$  and (13d) follows Inequality (5).

Proceeding by repeating the above procedure in (13e) from time step  $T-1$  to time step 1, we get:

$$m \mathfrak{R}_S(\mathcal{F}_{d,T}) \leq \frac{1}{\lambda} \log \left( 4^{dT} \mathbb{E}_{\epsilon \in \{\pm 1\}^m} \left[ \exp \left( \lambda \left( \sum_{l=1}^d \beta_l \Lambda_l \right) \left( \frac{\Lambda_0^T - 1}{\Lambda_0 - 1} \right) \sum_{i=1}^m \epsilon_i \mathbf{x}_{T,i,\kappa} \right) \exp \left( \lambda \Lambda_0^T \left\| \sum_{i=1}^m \epsilon_i \mathbf{h}_0 \right\|_\infty \right) \right] \right). \quad (14)$$

Let us denote  $\mu = \operatorname{argmax}_{j \in \{1, \dots, h\}} \left| \sum_{i=1}^m \epsilon_i \mathbf{h}_{0,j} \right|$ , from (14), we have:

$$m \mathfrak{R}_S(\mathcal{F}_{d,T}) \leq \frac{1}{\lambda} \log \left( 4^{dT} \mathbb{E}_{\epsilon \in \{\pm 1\}^m} \left[ \exp \left( \lambda \left( \sum_{l=1}^d \beta_l \Lambda_l \right) \left( \frac{\Lambda_0^T - 1}{\Lambda_0 - 1} \right) \sum_{i=1}^m \epsilon_i \mathbf{x}_{T,i,\kappa} \right) \exp \left( \lambda \Lambda_0^T \sum_{i=1}^m \epsilon_i \mathbf{h}_{0,\mu} \right) \right] \right) \\ \leq \frac{2dT \log 2}{\lambda} + \frac{1}{2\lambda} \log \left( \mathbb{E}_{\epsilon \in \{\pm 1\}^m} \left[ \exp \left( \lambda \left( \sum_{l=1}^d \beta_l \Lambda_l \right) \left( \frac{\Lambda_0^T - 1}{\Lambda_0 - 1} \right) \sum_{i=1}^m \epsilon_i \mathbf{x}_{T,i,\kappa} \right) \exp \left( \lambda \Lambda_0^T \sum_{i=1}^m \epsilon_i \mathbf{h}_{0,\mu} \right) \right] \right)^2 \\ \leq \frac{2dT \log 2}{\lambda} + \frac{1}{2\lambda} \log \mathbb{E}_{\epsilon \in \{\pm 1\}^m} \left[ \exp \left( 2\lambda \left( \sum_{l=1}^d \beta_l \Lambda_l \right) \left( \frac{\Lambda_0^T - 1}{\Lambda_0 - 1} \right) \sum_{i=1}^m \epsilon_i \mathbf{x}_{T,i,\kappa} \right) \right] + \frac{1}{2\lambda} \log \mathbb{E}_{\epsilon \in \{\pm 1\}^m} \left[ \exp \left( 2\lambda \Lambda_0^T \sum_{i=1}^m \epsilon_i \mathbf{h}_{0,\mu} \right) \right] \quad (15a)$$

$$\leq \frac{2dT \log 2}{\lambda} + \frac{1}{2\lambda} \log \sum_{j=1}^n \mathbb{E}_{\epsilon \in \{\pm 1\}^m} \left[ \exp \left( 2\lambda \left( \sum_{l=1}^d \beta_l \Lambda_l \right) \left( \frac{\Lambda_0^T - 1}{\Lambda_0 - 1} \right) \sum_{i=1}^m \epsilon_i \mathbf{x}_{T,i,j} \right) \right] \\ + \frac{1}{2\lambda} \log \sum_{j=1}^h \mathbb{E}_{\epsilon \in \{\pm 1\}^m} \left[ \exp \left( 2\lambda \Lambda_0^T \sum_{i=1}^m \epsilon_i \mathbf{h}_{0,j} \right) \right] \quad (15b)$$

$$\leq \frac{2dT \log 2}{\lambda} + \frac{1}{2\lambda} \log \sum_{j=1}^n \prod_{i=1}^m \mathbb{E}_{\epsilon \in \{\pm 1\}^m} \left[ \exp \left( 2\lambda \left( \sum_{l=1}^d \beta_l \Lambda_l \right) \left( \frac{\Lambda_0^T - 1}{\Lambda_0 - 1} \right) \epsilon_i \mathbf{x}_{T,i,j} \right) \right]$$

$$\begin{aligned}
& + \frac{1}{2\lambda} \log \sum_{j=1}^h \prod_{i=1}^m \mathbb{E}_{\epsilon \in \{\pm 1\}^m} \left[ \exp \left( 2\lambda \Lambda_0^T \epsilon_i \mathbf{h}_{0,j} \right) \right] \\
& \leq \frac{2dT \log 2}{\lambda} + \frac{1}{2\lambda} \log \sum_{j=1}^n \prod_{i=1}^m \left[ \frac{1}{2} \exp \left( 2\lambda \left( \sum_{l=1}^d \beta_l \Lambda_l \right) \left( \frac{\Lambda_0^T - 1}{\Lambda_0 - 1} \right) \mathbf{x}_{\tau,i,j} \right) + \frac{1}{2} \exp \left( -2\lambda \left( \sum_{l=1}^d \beta_l \Lambda_l \right) \left( \frac{\Lambda_0^T - 1}{\Lambda_0 - 1} \right) \mathbf{x}_{\tau,i,j} \right) \right] \\
& \quad + \frac{1}{2\lambda} \log \sum_{j=1}^h \prod_{i=1}^m \left[ \frac{1}{2} \exp \left( 2\lambda \Lambda_0^T \mathbf{h}_{0,j} \right) + \frac{1}{2} \exp \left( -2\lambda \Lambda_0^T \mathbf{h}_{0,j} \right) \right] \\
& \leq \frac{2dT \log 2}{\lambda} + \frac{1}{2\lambda} \log \sum_{j=1}^n \left[ \exp \left( 2\lambda^2 \left( \sum_{l=1}^d \beta_l \Lambda_l \right)^2 \left( \frac{\Lambda_0^T - 1}{\Lambda_0 - 1} \right)^2 \sum_{i=1}^m x_{\tau,i,j}^2 \right) \right] + \frac{1}{2\lambda} \log \sum_{j=1}^h \left[ \exp \left( 2\lambda^2 \Lambda_0^{2T} \sum_{i=1}^m h_{0,j}^2 \right) \right] \tag{15c}
\end{aligned}$$

$$\begin{aligned}
& \leq \frac{2dT \log 2}{\lambda} + \frac{\log n}{2\lambda} + \lambda \left( \sum_{l=1}^d \beta_l \Lambda_l \right)^2 \left( \frac{\Lambda_0^T - 1}{\Lambda_0 - 1} \right)^2 m B_{\mathbf{x}}^2 + \frac{\log h}{2\lambda} + \lambda \Lambda_0^{2T} m \|\mathbf{h}_0\|_{\infty}^2 \\
& \leq \frac{2dT \log 2 + \log \sqrt{n} + \log \sqrt{h}}{\lambda} + \lambda \left( \left( \sum_{l=1}^d \beta_l \Lambda_l \right)^2 \left( \frac{\Lambda_0^T - 1}{\Lambda_0 - 1} \right)^2 m B_{\mathbf{x}}^2 + \Lambda_0^{2T} m \|\mathbf{h}_0\|_{\infty}^2 \right), \tag{15d}
\end{aligned}$$

where (15a) follows Inequality (19), (15b) holds by replacing with  $\sum_{j=1}^n$  and  $\sum_{j=1}^h$ , respectively. In addition, (15c) follows (18) and (15d) is received by the following definition: At time step  $t$ , we define  $\mathbf{X}_t \in \mathbb{R}^{n \times m}$ , a matrix composed of  $m$  columns from the  $m$  input vectors  $\{\mathbf{x}_{t,i}\}_{i=1}^m$ ; we also define  $\|\mathbf{X}_t\|_{2,\infty} = \sqrt{\max_{k \in \{1, \dots, n\}} \sum_{i=1}^m x_{t,i,k}^2} \leq \sqrt{m} B_{\mathbf{x}}$ , representing the maximum of the  $\ell_2$ -norms of the rows of matrix  $\mathbf{X}_t$ , and  $\|\mathbf{h}_0\|_{\infty} = \max_j |\mathbf{h}_{0,j}|$ .

Choosing  $\lambda = \sqrt{\frac{2dT \log 2 + \log \sqrt{n} + \log \sqrt{h}}{\left( \sum_{l=1}^d \beta_l \Lambda_l \right)^2 \left( \frac{\Lambda_0^T - 1}{\Lambda_0 - 1} \right)^2 m B_{\mathbf{x}}^2 + \Lambda_0^{2T} m \|\mathbf{h}_0\|_{\infty}^2}}$ , we achieve the upper bound:

$$\mathfrak{R}_S(\mathcal{F}_{d,T}) \leq \sqrt{\frac{2(4dT \log 2 + \log n + \log h)}{m} \left( \left( \sum_{l=1}^d \beta_l \Lambda_l \right)^2 \left( \frac{\Lambda_0^T - 1}{\Lambda_0 - 1} \right)^2 B_{\mathbf{x}}^2 + \Lambda_0^{2T} \|\mathbf{h}_0\|_{\infty}^2 \right)}. \tag{16}$$

It can be noted that  $\mathfrak{R}_S(\mathcal{F}_{d,T})$  in (16) is derived for the real-valued functions  $\mathcal{F}_{d,T}$ . For the vector-valued functions  $\mathcal{F}_{d,T} : \mathbb{R}^h \times \mathbb{R}^n \mapsto \mathbb{R}^h$  [in Theorem 3.3] we apply the contraction lemma [Lemma 2.1] to a Lipschitz loss to obtain the complexity of such vector-valued functions by means of the complexity of the real-valued functions. Specifically, in Theorem 3.3 under the assumption of the 1-Lipschitz loss function and from Theorem 3.2, Lemma 2.1, we complete the proof.  $\square$

### Supporting inequalities:

(i) If  $A, B$  are sets of positive real numbers, then:

$$\sup(AB) = \sup(A) \cdot \sup(B). \tag{17}$$

(ii) Given  $x \in \mathbb{R}$ , we have:

$$\frac{\exp(x) + \exp(-x)}{2} \leq \exp(x^2/2). \tag{18}$$

(iii) Let  $X$  and  $Y$  be random variables, the Cauchy–Bunyakovsky–Schwarz inequality gives:

$$(\mathbb{E}[XY])^2 \leq \mathbb{E}[X^2] \cdot \mathbb{E}[Y^2]. \tag{19}$$

(iv) If  $\psi$  is a convex function, the Jensen's inequality gives:

$$\psi(\mathbb{E}[X]) \leq \mathbb{E}[\psi(X)]. \tag{20}$$

## 4 EXTENSION OF GENERALIZATION ERROR BOUND FOR CLASSIFICATION

*Proof.* Let  $\mathbf{y} = \mathbf{Y}\mathbf{h}_t^{(d)} \equiv y(\mathbf{h}_t^{(d)})$  be a linear classifier with  $\mathbf{Y} \in \mathbb{R}^{c \times h}$ . Let  $\mathbf{Y}_i$  denote the  $i^{\text{th}}$  row of  $\mathbf{Y}$ . Below, we show that each entry  $y_i(\mathbf{h}_t^{(d)})$  is  $\rho$ -Lipschitz on its input with  $\rho = \min(\max_i \|\mathbf{Y}_i\|_2, \max_i \|\mathbf{Y}_i\|_1)$ :

$$\forall \mathbf{h}, \mathbf{h}' \in \mathbb{R}^h, \forall i \in \{1, \dots, c\} : |y_i - y'_i| = \left| \mathbf{Y}_i^T \mathbf{h} - \mathbf{Y}_i^T \mathbf{h}' \right| = \left| \mathbf{Y}_i^T (\mathbf{h} - \mathbf{h}') \right| \quad (21)$$

$$\leq \|\mathbf{Y}_i\|_2 \|\mathbf{h} - \mathbf{h}'\|_2 \quad (22)$$

$$\leq \max_{j \in \{1, \dots, c\}} \|\mathbf{Y}_j\|_2 \|\mathbf{h} - \mathbf{h}'\|_2 \quad (23)$$

In the development above, line 22 was obtained by applying the triangular inequality. Moreover, in line 23, we have identified a unique Lipschitz constant that is valid for all  $i$ . Alternatively, we can also write that:

$$\forall \mathbf{h}, \mathbf{h}' \in \mathbb{R}^h, \forall i \in \{1, \dots, c\} : |y_i - y'_i| \leq \|\mathbf{Y}_i\|_1 \|\mathbf{h} - \mathbf{h}'\|_\infty \quad (24)$$

$$\leq \max_{j \in \{1, \dots, c\}} \|\mathbf{Y}_j\|_1 \|\mathbf{h} - \mathbf{h}'\|_\infty \quad (25)$$

$$\leq \max_{j \in \{1, \dots, c\}} \|\mathbf{Y}_j\|_1 \|\mathbf{h} - \mathbf{h}'\|_2 \quad (26)$$

In the development above, line 25 was obtained using Hölder's inequality [see Proposition 2.2] and line 26 was obtained considering that the  $\ell_2$  norm is an upper bound of the  $\ell_\infty$  norm. Setting  $\rho = \min\{\max_i \|\mathbf{Y}_i\|_2, \max_i \|\mathbf{Y}_i\|_1\}$  completes the proof and shows that  $\rho$  is a Lipschitz constant for each entry  $y_i(\mathbf{h}_t^{(d)})$ . To obtain the generalization upper bound proposed in section 4.3 using the ramp loss evaluated on the classification margin  $\ell_\gamma(\mathbf{y})$  (which is  $\frac{1}{\gamma}$ -Lipschitz), it suffices to apply the contraction lemma twice [see Proposition 2.1], first for the composition with multivariate linear classifier function and secondly with the  $\ell_\gamma$  loss function, leading to:

$$L_{\mathcal{D}, \gamma}(f) - L_{S, \gamma}(f) \leq \frac{2\rho}{\gamma} \mathfrak{R}_S(\mathcal{F}_{d, T}) + 4\sqrt{\frac{2 \log(4/\delta)}{m}} \quad (27)$$

□

### References

- Huynh Van Luong, Boris Joukovsky, and Nikos Deligiannis. Designing interpretable recurrent neural networks for video reconstruction via deep unfolding. *IEEE Transactions on Image Processing*, 30:4099–4113, 2021.
- Mehryar Mohri, Afshin Rostamizadeh, and Ameet Talwalkar. *Foundations of Machine Learning, Second edition*. MIT Press, Cambridge, Massachusetts, USA, 2018. ISBN 9780262039406.
- Shai Shalev-Shwartz and Shai Ben-David. *Understanding Machine Learning: From Theory to Algorithms*. Cambridge University Press, New York, NY, USA, 2014.
